# Supplementary material for: Dysfunctional neuroplasticity in newly arrived Middle Eastern refugees in the U.S.: Association with environmental exposures and mental health symptoms
Source: PLoS One. 2020 Mar 6;15(3):e0230030. doi: 10.1371/journal.pone.0230030 (PMC7059916; doi:10.1371/journal.pone.0230030)
Supplement: S1 Dataset — (XLSX) [file pone.0230030.s001.xlsx]

## Sheet: Manuscript_dataset
q1	q2	q3	HTQ_BeforeUS	ZHTQ_BeforeUS	EnvExp.Chem_Freq	ZEnvExp.Chem_Freq	MnConc.ppb	CoConc.ppb	NiConc.ppb	AsConc.ppb	CdConc.ppb	PbConc.ppb	ZMnConc.ppb	ZCoConc.ppb	ZNiConc.ppb	ZAsConc.ppb	ZCdConc.ppb	ZPbConc.ppb	BDNF	NGF	ZBDNF	ZNGF	PCLC	HADS	BAI	ZPCLC	ZHADS	ZBAI	q5	Zq5	Neuroplasticity	ZNeuroplasticity
50 - 60	1	1	7	-0.847041	10	1.65942	0.0661696	0.0395175	0.14203	0.0917019	0.0630838	4.91216	-0.617845	6.50149	0.253468	6.00294	3.12459	2.92901	#NULL!	#NULL!	#NULL!	#NULL!	34	11	5	0.0037783	1.07775	-0.709148	4	0.898717	#NULL!	#NULL!
51 - 60	2	1	13	0.150409	0	-0.619613	0.0645904	0.011656	0.10431	0.0269578	0.0129511	0.176204	-0.637264	0.846267	-0.0999284	0.787697	-0.216661	-0.314987	#NULL!	#NULL!	#NULL!	#NULL!	40	6	20	0.4874	-0.0718502	0.617913	1	-1.79743	#NULL!	#NULL!
51 - 60	1	1	8	-0.680799	0	-0.619613	0.0891403	0.013424	0.126174	0.0202022	0.00802389	0.420921	-0.335385	1.20512	0.104917	0.243528	-0.545051	-0.147363	#NULL!	#NULL!	#NULL!	#NULL!	33	1	8	-0.0768254	-1.22145	-0.443736	1	-1.79743	#NULL!	#NULL!
21 - 30	1	1	13	0.150409	0	-0.619613	0.0327186	0.00485798	0.131088	0.0176745	0.00278447	0	-1.02918	-0.533567	0.150957	0.0399139	-0.894248	-0.435682	#NULL!	#NULL!	#NULL!	#NULL!	26	1	0	-0.641051	-1.22145	-1.1515	2	-0.898717	#NULL!	#NULL!
21 - 30	1	1	6	-1.01328	0	-0.619613	0.0543022	0.00603528	0.0925936	0.0157592	0.0599031	0.742087	-0.763774	-0.294603	-0.209693	-0.114364	2.9126	0.0726268	#NULL!	#NULL!	#NULL!	#NULL!	17	1	0	-1.36648	-1.22145	-1.1515	1	-1.79743	#NULL!	#NULL!
21 - 30	2	1	10	-0.348316	0	-0.619613	0.0577467	0.00772006	0.0987642	0.0139487	0.00704118	0.382487	-0.721418	0.0473666	-0.151882	-0.260201	-0.610547	-0.173689	#NULL!	#NULL!	#NULL!	#NULL!	23	9	12	-0.882862	0.617911	-0.0898531	3	0	#NULL!	#NULL!
21 - 30	1	1	15	0.482892	9	1.43152	0.058904	0.00726265	0.11946	0.0156472	0.0296231	2.14857	-0.707187	-0.0454764	0.0420118	-0.123387	0.894497	1.03603	648.876	35.8095	-0.773455	-0.611337	44	3	14	0.809815	-0.761612	0.0870884	3	0	684.686	-1.38479
41 - 50	1	1	#NULL!	#NULL!	6	0.747808	0.0911747	0.00753676	0.130788	0.0623933	0.00521511	0.376633	-0.310369	0.0101603	0.148143	3.64209	-0.732251	-0.177699	517.5	11.381	-0.853488	-0.948776	49	11	15	1.21283	1.07775	0.175559	2	-0.898717	528.881	-1.80226
31 - 40	2	1	13	0.150409	0	-0.619613	0.0596574	0.00335938	0.0902647	0.0185906	0.00410437	0.199864	-0.697923	-0.837747	-0.231513	0.113711	-0.80628	-0.29878	634.248	55.2857	-0.782366	-0.342307	17	4	4	-1.36648	-0.531691	-0.797619	2	-0.898717	689.534	-1.12467
21 - 30	1	1	10	-0.348316	12	2.11523	0.0592185	0.00753175	0.130529	0.00954694	0.00677227	0.212853	-0.70332	0.00914335	0.145722	-0.614772	-0.628469	-0.289883	733.976	26.2381	-0.721612	-0.74355	18	3	2	-1.28588	-0.761612	-0.974561	1	-1.79743	760.214	-1.46516
51 - 60	1	1	16	0.649134	9	1.43152	0.0610965	0.00536324	0.117727	0.016151	0.00813579	1.01147	-0.680227	-0.431012	0.0257759	-0.0828008	-0.537593	0.257144	1472.87	71	-0.27148	-0.12524	43	6	15	0.729211	-0.0718502	0.175559	3	0	1543.87	-0.39672
21 - 30	1	1	11	-0.182074	18	3.48265	0.0559903	0.00523425	0.107535	0.0138675	0.00455809	0.288689	-0.743015	-0.457193	-0.0697086	-0.266744	-0.77604	-0.237938	2479.12	62.0952	0.341522	-0.248245	41	3	11	0.568004	-0.761612	-0.178324	1	-1.79743	2541.22	0.0932773
51 - 60	2	1	7	-0.847041	6	0.747808	0.0535271	0.00606283	0.114339	0.0133509	0.00646501	0.216951	-0.773304	-0.289012	-0.00596248	-0.308353	-0.648947	-0.287077	1310.13	31.619	-0.370625	-0.669221	29	9	8	-0.39924	0.617911	-0.443736	3	0	1341.75	-1.03985
31 - 40	2	1	7	-0.847041	0	-0.619613	0.0280987	0.00462373	0.130666	0.0106579	0.0043108	0	-1.08599	-0.581114	0.146999	-0.525284	-0.792521	-0.435682	#NULL!	#NULL!	#NULL!	#NULL!	26	5	3	-0.641051	-0.301771	-0.88609	3	0	#NULL!	#NULL!
31 - 40	1	1	23	1.81283	7	0.975712	0.060991	0.00762381	0.123145	0.0107055	0.00924598	0.251058	-0.681524	0.0278298	0.0765429	-0.521448	-0.463601	-0.263714	843.548	20.7143	-0.654862	-0.819852	25	0	3	-0.721655	-1.45137	-0.88609	2	-0.898717	864.262	-1.47471
41 - 50	2	2	5	-1.17952	0	-0.619613	0.070209	0.00979096	0.104603	0.0170892	0.0163845	8.10628	-0.568174	0.46771	-0.0971741	-0.0072344	0.0121705	5.11689	6863.48	198.143	3.01244	1.63102	32	5	16	-0.157429	-0.301771	0.26403	5	1.79743	7061.62	4.64347
21 - 30	2	2	3	-1.51201	0	-0.619613	0.053924	0.011301	0.12109	0.0121244	0.00963601	0.274138	-0.768424	0.774203	0.0572848	-0.407153	-0.437606	-0.247905	1238.27	15.8095	-0.414397	-0.887603	24	2	31	-0.802258	-0.991532	1.59109	4	0.898717	1254.08	-1.302
61 - 70	1	2	29	2.81027	16	3.02684	0.0758923	0.00694189	0.0989096	0.0159936	0.0150034	0.168476	-0.498289	-0.110583	-0.150519	-0.0954858	-0.0798829	-0.32028	6934.22	218.714	3.05554	1.91518	69	19	43	2.82491	2.91712	2.65274	5	1.79743	7152.94	4.97072
21 - 30	1	2	19	1.14786	15	2.79894	0.0575957	0.00625398	0.13647	0.0154731	0.0503772	0.529006	-0.723274	-0.250213	0.201378	-0.137407	2.27772	-0.0733275	1913.05	91.619	-0.00332838	0.159577	36	12	30	0.164986	1.30767	1.50262	3	0	2004.67	0.156248
31 - 40	2	2	16	0.649134	0	-0.619613	0.0831942	0.00793	0.137528	0.0124192	0.0101848	0.106411	-0.408501	0.0899792	0.211295	-0.383407	-0.401031	-0.362793	1672.1	129.333	-0.150113	0.680535	49	15	45	1.21283	1.99743	2.82968	4	0.898717	1801.43	0.530423
41 - 50	1	2	17	0.815375	0	-0.619613	0.0544256	0.00482916	0.105287	0.0189776	0.0136283	0.221621	-0.762255	-0.539417	-0.0907696	0.144884	-0.171529	-0.283878	4350.45	133.238	1.48152	0.734473	52	11	10	1.45464	1.07775	-0.266795	4	0.898717	4483.69	2.216
21 - 30	2	1	9	-0.514557	0	-0.619613	0.0645851	0.0120088	0.10834	0.0164305	0.00750305	0.227149	-0.637329	0.917879	-0.0621683	-0.0602866	-0.579764	-0.280091	1056.3	50.381	-0.525256	-0.410058	17	1	7	-1.36648	-1.22145	-0.532207	3	0	1106.68	-0.935313
41 - 50	2	1	17	0.815375	7	0.975712	0.0623361	0.00771842	0.1059	0.0150199	0.0216154	0.337384	-0.664984	0.0470334	-0.0850275	-0.173913	0.360795	-0.204583	2350.6	159.905	0.263226	1.10283	62	10	27	2.26068	0.847832	1.23721	4	0.898717	2510.5	1.36605
51 - 60	2	2	6	-1.01328	0	-0.619613	0.069795	0.00640956	0.0984596	0.0198561	0.017108	0.415347	-0.573265	-0.218634	-0.154736	0.21565	0.0603909	-0.151181	1624.4	132.81	-0.179172	0.728553	27	6	3	-0.560447	-0.0718502	-0.88609	3	0	1757.21	0.549381
31 - 40	1	2	17	0.815375	6	0.747808	0.0612598	0.00525378	0.121794	0.0114161	0.0386244	0.314838	-0.678219	-0.453229	0.0638863	-0.46421	1.49442	-0.220026	1327.1	200.905	-0.360285	1.66917	30	8	9	-0.318636	0.387991	-0.355265	4	0.898717	1528	1.30889
21 - 30	1	2	2	-1.67825	0	-0.619613	0.0656376	0.00907636	0.915541	0.0123682	0.00730102	0.54848	-0.624386	0.322662	7.50043	-0.387519	-0.593229	-0.0599883	2422.18	103.857	0.306829	0.328625	19	1	3	-1.20528	-1.22145	-0.88609	3	0	2526.03	0.635455
31 - 40	2	1	13	0.150409	0	-0.619613	0.0755966	0.00738664	0.141992	0.0121374	0.0114697	0.111548	-0.501926	-0.0203091	0.253116	-0.406109	-0.315393	-0.359274	792.074	69.4286	-0.686219	-0.146947	27	8	4	-0.560447	0.387991	-0.797619	4	0.898717	861.503	-0.833166
31 - 40	1	1	14	0.316651	0	-0.619613	0.0680286	0.0103491	0.127436	0.0111189	0.0366141	0.244469	-0.594985	0.580995	0.116737	-0.488148	1.36043	-0.268227	2918.98	150.81	0.609477	0.977192	25	2	4	-0.721655	-0.991532	-0.797619	3	0	3069.79	1.58667
31 - 40	1	2	16	0.649134	3	0.0640979	0.0717594	0.00831607	0.135067	0.0107935	0.0163884	0.462394	-0.54911	0.168343	0.188238	-0.514361	0.0124246	-0.118955	918.85	67.2857	-0.608988	-0.176547	53	8	19	1.53525	0.387991	0.529442	3	0	986.136	-0.785535
31 - 40	1	2	12	-0.0158325	0	-0.619613	0.0601213	0.00472218	0.0965755	0.0125058	0.0484616	0.305125	-0.692218	-0.561131	-0.172387	-0.376434	2.15005	-0.22668	3998.83	247.286	1.26732	2.30985	46	4	21	0.971022	-0.531691	0.706384	3	0	4246.11	3.57716
21 - 30	2	2	8	-0.680799	0	-0.619613	0.0458805	0.00876431	0.124217	0.0133595	0.00752865	0.148431	-0.867331	0.259324	0.086586	-0.307666	-0.578057	-0.334011	2190.2	102	0.16551	0.302972	25	11	7	-0.721655	1.07775	-0.532207	4	0.898717	2292.2	0.468482
21 - 30	2	1	9	-0.514557	0	-0.619613	0.0608922	0.00583469	0.0935732	0.0132402	0.00525591	0.157481	-0.682739	-0.335319	-0.200515	-0.317271	-0.729531	-0.327812	5790.85	246.905	2.35901	2.30458	56	11	31	1.77706	1.07775	1.59109	4	0.898717	6037.75	4.66359
41 - 50	2	1	4	-1.34577	0	-0.619613	0.195437	0.00750363	0.0824656	0.0132196	0.00916802	0.119274	0.971698	0.00343537	-0.304581	-0.318935	-0.468797	-0.353983	473.8	0	-0.88011	-1.10598	23	3	6	-0.882862	-0.761612	-0.620678	3	0	473.8	-1.98609
21 - 30	2	1	0	-2.01073	0	-0.619613	0.217491	0.00271823	0.0863197	0.0200844	0.00514656	0.166996	1.24289	-0.967885	-0.268473	0.234036	-0.736819	-0.321294	2969.58	177.762	0.640302	1.34949	19	1	5	-1.20528	-1.22145	-0.709148	1	-1.79743	3147.34	1.9898
41 - 50	1	2	18	0.981617	1	-0.391709	0.212151	0.00569415	0.0883009	0.014295	0.0134954	0.336135	1.17722	-0.363844	-0.249911	-0.232308	-0.180388	-0.205438	2865.25	159.762	0.576746	1.10085	45	15	19	0.890418	1.99743	0.529442	4	0.898717	3025.01	1.6776
21 - 30	2	2	20	1.3141	3	0.0640979	0.0135115	0.00142878	0.0329963	0.00379633	0.00786748	7.56853	-1.26536	-1.22961	-0.768055	-1.07799	-0.555476	4.74855	3711.33	273.952	1.09217	2.6782	45	12	34	0.890418	1.30767	1.8565	3	0	3985.28	3.77037
31 - 40	2	2	12	-0.0158325	1	-0.391709	0.335724	0.011213	0.122868	0.0191521	0.0162024	0.160694	2.69674	0.756345	0.0739426	0.158942	3.24825e-05	-0.325611	1315.88	83.2857	-0.367122	0.0444658	24	0	4	-0.802258	-1.45137	-0.797619	2	-0.898717	1399.16	-0.322656
21 - 30	1	2	13	0.150409	0	-0.619613	0.152438	0.00775552	0.0851783	0.0171339	0.00474338	0.463333	0.442956	0.0545638	-0.279166	-0.00362959	-0.763691	-0.118312	1518.28	73.9048	-0.243821	-0.0851161	30	6	7	-0.318636	-0.0718502	-0.532207	3	0	1592.18	-0.328937
21 - 30	2	2	11	-0.182074	0	-0.619613	0.0135894	0.00274889	0.0374334	0.00656849	0.00254025	0	-1.2644	-0.961661	-0.726484	-0.854691	-0.910525	-0.435682	782.598	2.28571	-0.691992	-1.07441	26	1	9	-0.641051	-1.22145	-0.355265	4	0.898717	784.884	-1.7664
31 - 40	1	1	11	-0.182074	2	-0.163806	0.0119301	0.00139903	0.0379497	0.0035592	0.00267699	0	-1.2848	-1.23565	-0.721647	-1.09709	-0.901412	-0.435682	715.898	30.1905	-0.732625	-0.688955	23	5	7	-0.882862	-0.301771	-0.532207	2	-0.898717	746.088	-1.42158
31 - 40	2	2	2	-1.67825	0	-0.619613	0.259162	0.00702617	0.0794653	0.0149182	0.00765971	0.130249	1.7553	-0.0934763	-0.332691	-0.182111	-0.569323	-0.346465	494.776	7	-0.867332	-1.00929	63	5	0	2.34128	-0.301771	-1.1515	4	0.898717	501.776	-1.87662
31 - 40	1	2	6	-1.01328	0	-0.619613	0.206315	0.00490708	0.0957133	0.0206377	0.0208783	0.189146	1.10546	-0.5236	-0.180465	0.278605	0.311671	-0.306122	629.648	23.3333	-0.785168	-0.783674	36	5	16	0.164986	-0.301771	0.26403	2	-0.898717	652.981	-1.56884
21 - 30	2	1	11	-0.182074	0	-0.619613	0.199598	0.0124829	0.0851884	0.0211123	0.00560451	0.250248	1.02287	1.0141	-0.279073	0.316834	-0.706298	-0.264269	493.626	5.61905	-0.868032	-1.02837	18	0	0	-1.28588	-1.45137	-1.1515	1	-1.79743	499.245	-1.8964
31 - 40	2	2	14	0.316651	0	-0.619613	0.176909	0.00882711	0.0993656	0.0163197	0.0119746	0.157134	0.743864	0.27207	-0.146247	-0.0692158	-0.281742	-0.328049	315.1	0	-0.976789	-1.10598	45	7	17	0.890418	0.15807	0.352501	3	0	315.1	-2.08277
41 - 50	1	2	14	0.316651	0	-0.619613	0.0116081	0.0021529	0.0425672	0.00424321	0.00179607	0	-1.28876	-1.08263	-0.678387	-1.042	-0.960123	-0.435682	4257.58	163.333	1.42494	1.15019	32	9	22	-0.157429	0.617911	0.794854	3	0	4420.91	2.57513
31 - 40	2	2	12	-0.0158325	1	-0.391709	0.215095	0.0133739	0.100509	0.0115559	0.0175851	0.291206	1.21343	1.19495	-0.135537	-0.452948	0.0921876	-0.236214	604.9	40.2857	-0.800245	-0.549506	38	9	14	0.326193	0.617911	0.0870884	4	0.898717	645.186	-1.34975
71 - 80	1	2	19	1.14786	3	0.0640979	0.0155079	0.0023448	0.0440096	0.00542146	0.00240632	0	-1.24081	-1.04368	-0.664872	-0.947086	-0.919451	-0.435682	1929.15	76.4286	0.00647965	-0.050254	43	5	30	0.729211	-0.301771	1.50262	2	-0.898717	2005.58	-0.0437743
61 - 70	2	2	7	-0.847041	0	-0.619613	0.181541	0.00530342	0.254531	0.0262518	0.00484249	0.249999	0.800821	-0.443153	1.30748	0.730834	-0.757085	-0.264439	6362.2	76.5957	2.70707	-0.0479447	25	3	3	-0.721655	-0.761612	-0.88609	3	0	6438.8	2.65912
31 - 40	1	2	12	-0.0158325	9	1.43152	0.19302	0.005612	0.0880889	0.0260084	0.0262805	1.11442	0.941975	-0.380519	-0.251898	0.711227	0.671715	0.327664	1303	0	-0.374966	-1.10598	44	11	18	0.809815	1.07775	0.440971	4	0.898717	1303	-1.48095
21 - 30	2	2	23	1.81283	4	0.292001	0.208386	0.00830174	0.104607	0.0112892	0.00605038	0.268989	1.13093	0.165433	-0.0971406	-0.47443	-0.676582	-0.251432	341.6	0	-0.960646	-1.10598	47	9	31	1.05163	0.617911	1.59109	5	1.79743	341.6	-2.06663
21 - 30	1	2	23	1.81283	3	0.0640979	0.0163235	0.0031511	0.041198	0.00531929	0.00264048	0	-1.23078	-0.880023	-0.691214	-0.955316	-0.903845	-0.435682	282.6	0	-0.996588	-1.10598	32	11	2	-0.157429	1.07775	-0.974561	2	-0.898717	282.6	-2.10257
31 - 40	1	2	14	0.316651	4	0.292001	0.159977	0.0068011	0.0819362	0.0216483	0.00869553	0.602675	0.535663	-0.139159	-0.309542	0.360013	-0.500287	-0.0228663	234.6	0	-1.02583	-1.10598	36	5	9	0.164986	-0.301771	-0.355265	4	0.898717	234.6	-2.13181
31 - 40	1	2	21	1.48034	2	-0.163806	0.206589	0.00684081	0.113921	0.0272777	0.00660507	0.582999	1.10884	-0.1311	-0.0098795	0.81347	-0.639612	-0.0363438	1621.4	60.9787	-0.180999	-0.263667	26	3	2	-0.641051	-0.761612	-0.974561	4	0.898717	1682.38	-0.444666
31 - 40	2	2	17	0.815375	0	-0.619613	0.2171	0.00861546	0.099269	0.0199914	0.0217489	0.189775	1.23808	0.22911	-0.147152	0.226544	0.369694	-0.305691	1169.8	29.8723	-0.456111	-0.693349	30	12	16	-0.318636	1.30767	0.26403	4	0.898717	1199.67	-1.14946
31 - 40	1	2	11	-0.182074	0	-0.619613	0.201944	0.0070289	0.102365	0.0224214	0.0411935	0.399167	1.05171	-0.0929217	-0.118145	0.422287	1.66564	-0.162263	1951.8	125.277	0.0202791	0.624498	20	1	0	-1.12467	-1.22145	-1.1515	3	0	2077.08	0.644778
21 - 30	2	2	19	1.14786	8	1.20362	0.222736	0.00951068	0.103002	0.00954255	0.0463711	0.358664	1.30738	0.410819	-0.112175	-0.615125	2.01072	-0.190007	2409.2	64.766	0.298925	-0.211353	44	11	36	0.809815	1.07775	2.03345	5	1.79743	2473.97	0.0875715
41 - 50	1	2	10	-0.348316	6	0.747808	0.236641	0.00772802	0.0910675	0.0208725	0.0102961	0.453672	1.47837	0.0489816	-0.223992	0.297518	-0.39361	-0.124929	1266.2	14.1702	-0.397384	-0.910247	30	10	9	-0.318636	0.847832	-0.355265	3	0	1280.37	-1.30763
41 - 50	2	2	0	-2.01073	0	-0.619613	0.198373	0.00694185	0.110334	0.0129175	0.0119806	0.220759	1.0078	-0.110592	-0.0434825	-0.343267	-0.281342	-0.284468	1196.4	18.7234	-0.439906	-0.847353	18	1	0	-1.28588	-1.22145	-1.1515	1	-1.79743	1215.12	-1.28726
21 - 30	1	2	5	-1.17952	0	-0.619613	0.274051	0.00550923	0.10485	0.0147277	0.040745	0.58668	1.93838	-0.401379	-0.0948618	-0.197453	1.63575	-0.0338222	1362.2	30.1277	-0.338902	-0.689822	20	2	3	-1.12467	-0.991532	-0.88609	2	-0.898717	1392.33	-1.02872
31 - 40	2	2	5	-1.17952	0	-0.619613	0.14703	0.00645544	0.0697065	0.0155939	0.0139854	0.630292	0.376463	-0.209322	-0.424121	-0.127683	-0.147729	-0.00394953	1087.4	84.6809	-0.506308	0.0637373	25	7	7	-0.721655	0.15807	-0.532207	2	-0.898717	1172.08	-0.442571
51 - 60	1	2	13	0.150409	3	0.0640979	0.250331	0.00543978	0.085596	0.0145697	0.0316276	0.556982	1.6467	-0.415476	-0.275254	-0.210179	1.02809	-0.054165	1777.8	94.9362	-0.0857207	0.205397	39	7	26	0.406797	0.15807	1.14874	4	0.898717	1872.74	0.119676
41 - 50	2	2	14	0.316651	0	-0.619613	0.181214	0.011624	0.093483	0.0173612	0.0209415	0.204099	0.796801	0.839776	-0.201361	0.0146826	0.315882	-0.295879	3621	123.404	1.03715	0.598635	39	9	22	0.406797	0.617911	0.794854	4	0.898717	3744.4	1.63578
31 - 40	1	2	17	0.815375	0	-0.619613	0.161414	0.00672766	0.0840454	0.0243585	0.038916	0.258497	0.55333	-0.154067	-0.289781	0.578324	1.51385	-0.258619	2597.4	90.5532	0.413575	0.144854	39	8	11	0.406797	0.387991	-0.178324	3	0	2687.95	0.558429
31 - 40	2	2	13	0.150409	0	-0.619613	0.162962	0.00528556	0.0779022	0.0198071	0.0089559	0.178575	0.572366	-0.446779	-0.347336	0.211698	-0.482934	-0.313363	691	0	-0.747793	-1.10598	35	4	18	0.0843819	-0.531691	0.440971	3	0	691	-1.85378

## Sheet: Variable labels
Variable name	Variable label	Values
q1	q1. How old are you? [Range shown to avoid identification]
q2	q2. What is your gender?	1 = Male, 2 = Female
q3	q3. From what country are you a refugee?	1 = Iraq, 2 = Syria
HTQ_BeforeUS	Pre-displacement trauma
ZHTQ_BeforeUS	Zscore: Pre-displacement trauma
EnvExp.Chem_Freq	Frequency of environmental exposure to chemical elements
ZEnvExp.Chem_Freq	Zscore: Frequency of environmental exposure to chemical elements
MnConc.ppb	Manganese concentration [ part per billion ]
CoConc.ppb	Cobalt concentration [ part per billion ]
NiConc.ppb	Nickel concentration [ part per billion ]
AsConc.ppb	Arsenic concentration [ part per billion ]
CdConc.ppb	Cadmium concentration [ part per billion ]
PbConc.ppb	Lead concentration [ part per billion ]
ZMnConc.ppb	Zscore: Manganese concentration [ part per billion ]
ZCoConc.ppb	Zscore: Cobalt concentration [ part per billion ]
ZNiConc.ppb	Zscore: Nickel concentration [ part per billion ]
ZAsConc.ppb	Zscore: Arsenic concentration [ part per billion ]
ZCdConc.ppb	Zscore: Cadmium concentration [ part per billion ]
ZPbConc.ppb	Zscore: Lead concentration [ part per billion ]
BDNF	Brain-derived neutotrophic factor
NGF	Nerve growth factor
ZBDNF	Zscore(BDNF)
ZNGF	Zscore(NGF)
PCLC	Post traumatic stress syndrome (PTSD; sum score of 17 items)
HADS	Hospital Anxiety and Depression Scale (HADS; sum score of 7 items)
BAI	Beck Anxiety Inventory (BAI; sum score of 21 items)
ZPCLC	Zscore: PTSD
ZHADS	Zscore: HADS
ZBAI	Zscore: BAI
q5	How would you rate your mental well-being today?	1 = Excellent, 2 = Very good, 3 = Good, 4 = Fair, 5 = Poor
Zq5	Zscore: How would you rate your mental well-being today?
Neuroplasticity	Sum score of BDNF and NGF
ZNeuroplasticity	Z score: Sum score of BDNF and NGF
